# Supplementary material for: Bacterial infections epidemiology and factors associated with multidrug resistance in the northern region of Ghana
Source: PubMed Central journal article supplement (PMC9772187; doi:10.1038/s41598-022-26547-7), 2022-12-21
Supplement: 41598_2022_26547_MOESM1_ESM.pdf [file 41598_2022_26547_MOESM1_ESM.pdf]

**Bacterial Infections Epidemiology and factors associated with Multidrug Resistance in  
the northern region of Ghana**

Jean-Pierre Gnimatin<sup>1\*</sup>, Enoch Weyori<sup>2</sup>, Shimea M. Agossou<sup>3</sup>, & Martin Nyaaba Adokiya<sup>4</sup>

**S1 Table.** Samples received at the TZPHRL between June 2018 and May 2022

| Sample              | N = 1,222 <sup>1</sup> |
|---------------------|------------------------|
| Sputum              | 827 (68%)              |
| Urine               | 133 (11%)              |
| High vaginal swab   | 78 (6.4%)              |
| Wound Swab          | 74 (6.1%)              |
| Blood               | 62 (5.1%)              |
| Aspirates           | 18 (1.5%)              |
| Gastric lavage      | 4 (0.3%)               |
| Stool               | 4 (0.3%)               |
| Pus                 | 3 (0.2%)               |
| Throat Swab         | 3 (0.2%)               |
| Semen               | 2 (0.2%)               |
| Tissue              | 2 (0.2%)               |
| Urethral Swab       | 2 (0.2%)               |
| Abdominal Abscess   | 1 (<0.1%)              |
| Bone Scrab          | 1 (<0.1%)              |
| Cerebrospinal Fluid | 1 (<0.1%)              |
| Nails               | 1 (<0.1%)              |
| Scrotal Swab        | 1 (<0.1%)              |

<sup>1</sup> n (%)
