# Supplementary material for: Bacterial infections epidemiology and factors associated with multidrug resistance in the northern region of Ghana
Source: PubMed Central journal article supplement (PMC9772187; doi:10.1038/s41598-022-26547-7), 2022-12-21
Supplement: 41598_2022_26547_MOESM2_ESM.pdf [file 41598_2022_26547_MOESM2_ESM.pdf]

**Bacterial Infections Epidemiology and factors associated with Multidrug Resistance in  
the northern region of Ghana**

Jean-Pierre Gnimatin<sup>1\*</sup>, Enoch Weyori<sup>2</sup>, Shimea M. Agossou<sup>3</sup>, & Martin Nyaaba Adokiya<sup>4</sup>

**S2 Table.** Sex-based distribution of the isolated bacteria

| Isolated bacteria           | Female<br>N = 593 <sup>1</sup> | Male<br>N = 590 <sup>1</sup> | Overall<br>N = 1,183 <sup>1</sup> | p-value <sup>2</sup> |
|-----------------------------|--------------------------------|------------------------------|-----------------------------------|----------------------|
|                             |                                |                              |                                   | 0.018                |
| <i>Klebsiella spp.</i>      | 162 (51%)                      | 158 (49%)                    | 320 (100%)                        |                      |
| <i>Moraxella spp.</i>       | 115 (44%)                      | 146 (56%)                    | 261 (100%)                        |                      |
| <i>Escherichia spp.</i>     | 120 (62%)                      | 75 (38%)                     | 195 (100%)                        |                      |
| <i>Pseudomonas spp.</i>     | 62 (41%)                       | 90 (59%)                     | 152 (100%)                        |                      |
| <i>Staphylococcus spp.</i>  | 49 (56%)                       | 39 (44%)                     | 88 (100%)                         |                      |
| <i>Enterobacter spp.</i>    | 33 (53%)                       | 29 (47%)                     | 62 (100%)                         |                      |
| <i>Acinetobacter spp.</i>   | 22 (46%)                       | 26 (54%)                     | 48 (100%)                         |                      |
| <i>Proteus spp.</i>         | 5 (38%)                        | 8 (62%)                      | 13 (100%)                         |                      |
| <i>Raoultella spp.</i>      | 7 (64%)                        | 4 (36%)                      | 11 (100%)                         |                      |
| <i>Streptococcus spp.</i>   | 8 (89%)                        | 1 (11%)                      | 9 (100%)                          |                      |
| <i>Salmonella spp.</i>      | 2 (40%)                        | 3 (60%)                      | 5 (100%)                          |                      |
| <i>Serratia spp.</i>        | 1 (25%)                        | 3 (75%)                      | 4 (100%)                          |                      |
| <i>Corynebacterium spp.</i> | 2 (67%)                        | 1 (33%)                      | 3 (100%)                          |                      |
| <i>Citrobacter spp.</i>     | 0 (0%)                         | 2 (100%)                     | 2 (100%)                          |                      |
| <i>Enterococcus spp.</i>    | 1 (50%)                        | 1 (50%)                      | 2 (100%)                          |                      |
| <i>Micrococcus spp.</i>     | 1 (50%)                        | 1 (50%)                      | 2 (100%)                          |                      |
| <i>Pantoea spp.</i>         | 1 (50%)                        | 1 (50%)                      | 2 (100%)                          |                      |
| <i>Gardnerella spp.</i>     | 1 (100%)                       | 0 (0%)                       | 1 (100%)                          |                      |
| <i>Photobacterium spp.</i>  | 0 (0%)                         | 1 (100%)                     | 1 (100%)                          |                      |
| <i>Providencia spp.</i>     | 0 (0%)                         | 1 (100%)                     | 1 (100%)                          |                      |

| <b>Isolated bacteria</b> | <b>Female</b><br>N = 593 <sup>1</sup> | <b>Male</b><br>N = 590 <sup>1</sup> | <b>Overall</b><br>N = 1,183 <sup>1</sup> | <b>p-value<sup>2</sup></b> |
|--------------------------|---------------------------------------|-------------------------------------|------------------------------------------|----------------------------|
| <i>Sphingomonas spp.</i> | 1 (100%)                              | 0 (0%)                              | 1 (100%)                                 |                            |

<sup>1</sup> n (%); <sup>2</sup> Pearson's Chi-squared test
