# Supplementary material for: Bacterial infections epidemiology and factors associated with multidrug resistance in the northern region of Ghana
Source: PubMed Central journal article supplement (PMC9772187; doi:10.1038/s41598-022-26547-7), 2022-12-21
Supplement: 41598_2022_26547_MOESM3_ESM.pdf [file 41598_2022_26547_MOESM3_ESM.pdf]

**Bacterial Infections Epidemiology and factors associated with Multidrug Resistance in  
the northern region of Ghana**

Jean-Pierre Gnimatin<sup>1\*</sup>, Enoch Weyori<sup>2</sup>, Shimea M. Agossou<sup>3</sup>, & Martin Nyaaba Adokiya<sup>4</sup>

**S3 Table.** Distribution of the isolated bacteria by patient age group

| Characteristic              | Under 5<br>N = 27 <sup>l</sup> | 5 – 14<br>N = 49 <sup>l</sup> | 15 – 24<br>N = 97 <sup>l</sup> | 25 – 44<br>N = 442 <sup>l</sup> | 45 – 59<br>N = 211 <sup>l</sup> | 60 +<br>N = 319 <sup>l</sup> | p-value <sup>2</sup> |
|-----------------------------|--------------------------------|-------------------------------|--------------------------------|---------------------------------|---------------------------------|------------------------------|----------------------|
| Bacteria                    |                                |                               |                                |                                 |                                 |                              | <0.001               |
| <i>Klebsiella spp.</i>      | 3 (11%)                        | 7 (14%)                       | 24 (25%)                       | 126 (29%)                       | 54 (26%)                        | 96 (30%)                     |                      |
| <i>Moraxella spp.</i>       | 4 (15%)                        | 11 (22%)                      | 11 (11%)                       | 104 (24%)                       | 55 (26%)                        | 72 (23%)                     |                      |
| <i>Escherichia spp.</i>     | 0 (0%)                         | 7 (14%)                       | 28 (29%)                       | 73 (17%)                        | 33 (16%)                        | 47 (15%)                     |                      |
| <i>Pseudomonas spp.</i>     | 2 (7.4%)                       | 4 (8.2%)                      | 8 (8.2%)                       | 53 (12%)                        | 29 (14%)                        | 49 (15%)                     |                      |
| <i>Staphylococcus spp.</i>  | 13 (48%)                       | 5 (10%)                       | 9 (9.3%)                       | 32 (7.2%)                       | 9 (4.3%)                        | 11 (3.4%)                    |                      |
| <i>Enterobacter spp.</i>    | 0 (0%)                         | 3 (6.1%)                      | 8 (8.2%)                       | 17 (3.8%)                       | 12 (5.7%)                       | 23 (7.2%)                    |                      |
| <i>Acinetobacter spp.</i>   | 2 (7.4%)                       | 5 (10%)                       | 4 (4.1%)                       | 14 (3.2%)                       | 8 (3.8%)                        | 14 (4.4%)                    |                      |
| <i>Proteus spp.</i>         | 0 (0%)                         | 2 (4.1%)                      | 0 (0%)                         | 5 (1.1%)                        | 6 (2.8%)                        | 1 (0.3%)                     |                      |
| <i>Raoultella spp.</i>      | 0 (0%)                         | 0 (0%)                        | 2 (2.1%)                       | 5 (1.1%)                        | 1 (0.5%)                        | 3 (0.9%)                     |                      |
| <i>Streptococcus spp.</i>   | 1 (3.7%)                       | 0 (0%)                        | 1 (1.0%)                       | 5 (1.1%)                        | 2 (0.9%)                        | 0 (0%)                       |                      |
| <i>Salmonella spp.</i>      | 2 (7.4%)                       | 2 (4.1%)                      | 0 (0%)                         | 0 (0%)                          | 0 (0%)                          | 1 (0.3%)                     |                      |
| <i>Corynebacterium spp.</i> | 0 (0%)                         | 1 (2.0%)                      | 0 (0%)                         | 2 (0.5%)                        | 0 (0%)                          | 0 (0%)                       |                      |
| <i>Serratia spp.</i>        | 0 (0%)                         | 0 (0%)                        | 1 (1.0%)                       | 2 (0.5%)                        | 0 (0%)                          | 0 (0%)                       |                      |
| <i>Citrobacter spp.</i>     | 0 (0%)                         | 0 (0%)                        | 0 (0%)                         | 0 (0%)                          | 1 (0.5%)                        | 1 (0.3%)                     |                      |
| <i>Micrococcus spp.</i>     | 0 (0%)                         | 0 (0%)                        | 1 (1.0%)                       | 0 (0%)                          | 1 (0.5%)                        | 0 (0%)                       |                      |
| <i>Pantoea spp.</i>         | 0 (0%)                         | 0 (0%)                        | 0 (0%)                         | 2 (0.5%)                        | 0 (0%)                          | 0 (0%)                       |                      |
| <i>Enterococcus spp.</i>    | 0 (0%)                         | 0 (0%)                        | 0 (0%)                         | 0 (0%)                          | 0 (0%)                          | 1 (0.3%)                     |                      |
| <i>Gardnerella spp.</i>     | 0 (0%)                         | 1 (2.0%)                      | 0 (0%)                         | 0 (0%)                          | 0 (0%)                          | 0 (0%)                       |                      |
| <i>Photobacterium spp.</i>  | 0 (0%)                         | 0 (0%)                        | 0 (0%)                         | 1 (0.2%)                        | 0 (0%)                          | 0 (0%)                       |                      |
| <i>Providencia spp.</i>     | 0 (0%)                         | 1 (2.0%)                      | 0 (0%)                         | 0 (0%)                          | 0 (0%)                          | 0 (0%)                       |                      |

| <b>Characteristic</b>    | <b>Under 5</b><br>N = 27 <sup>1</sup> | <b>5 – 14</b><br>N = 49 <sup>1</sup> | <b>15 – 24</b><br>N = 97 <sup>1</sup> | <b>25 – 44</b><br>N = 442 <sup>1</sup> | <b>45 – 59</b><br>N = 211 <sup>1</sup> | <b>60 +</b><br>N = 319 <sup>1</sup> | <b>p-value</b> <sup>2</sup> |
|--------------------------|---------------------------------------|--------------------------------------|---------------------------------------|----------------------------------------|----------------------------------------|-------------------------------------|-----------------------------|
| <i>Sphingomonas spp.</i> | 0 (0%)                                | 0 (0%)                               | 0 (0%)                                | 1 (0.2%)                               | 0 (0%)                                 | 0 (0%)                              |                             |

<sup>1</sup> n (%), <sup>2</sup> Pearson's Chi-squared test
